# Supplementary material for: Machine learning discriminates a movement disorder in a zebrafish model of Parkinson's disease
Source: Oxford University Press journal article supplement (doi:10.1242/dmm.045815), 2020-08-28
Supplement: dmm045815supp.pdf [file dmm045815supp.pdf]

## SUPPLEMENTARY DATA

Table S1

## Primer sequences for qRT-PCR analysis (5' – 3').

Primer pairs that were designed based on previous publications: *dat*, *th* (Chen et al., 2012), *pitx3* (Sanchez-Simon et al., 2010) and *ef1a* (Fan et al., 2010).

| Name          | Forward primer           | Reverse primer            |
|---------------|--------------------------|---------------------------|
| <i>dj-1</i>   | CGCACACAAACAGGGTCCATA    | AAGCAAACCTCCAGGCAGAA      |
| <i>dat</i>    | CGTCACCAACGGTGAATCTA     | TGCCGATGGCCTCAATTAGTA     |
| <i>th</i>     | GACGGAAGATGATCGGAGACA    | CCGCCATGTTCCGATTTCT       |
| <i>pitx3</i>  | GACAACAGTGACACAGAGAAGT   | TGTCGGGATAACGGTTTCT       |
| <i>syn2a</i>  | CAAGGTTGTGAGGTCATTTAAGC  | GTAAGTGGAGGCCGATGATTAAG   |
| <i>ef1a</i>   | TTGAGAAGAAAATCGGTGGTGCTG | GGAACGGTGTGATTGAGGGAAATTC |
| <i>pkma</i>   | CCGCACACAGCACATGATTG     | ACTGCATCTGAAGGGTCACG      |
| <i>vamp3</i>  | GAGCTGGATGATCGTGCTGA     | ATGGCCCACATCTTGACGTT      |
| <i>brk</i>    | GCAGGTCTCGTTTAGCCACT     | TTGTGACTCTGGCTTCGATGT     |
| <i>gpx3</i>   | ACCATAAACGGGACGCAGTT     | AGTGCATTCAGTTCCACGTACT    |
| <i>gatm</i>   | TCCAGAGGAGTCAGGTTACGA    | ATGTTGAAGGTGGCGTCGAT      |
| <i>abcf2a</i> | CGGAACAGGCAAATCCATGC     | GCTCTGGAATTGGCACCTCT      |
| <i>kcnk3b</i> | AGGTCGTGTTGCTCCTGAAG     | CATGGCCATAACCTATGGTTGTTA  |

**Table S2a****Genes significantly up-regulated in *dj-1*<sup>-/-</sup> zebrafish brains**

Genes that were up-regulated in the brains of *dj-1*<sup>-/-</sup> mutants (n = 3) when compared to their wild-type siblings (n = 3) at 16 wpf. Differentially expressed transcripts from the RNA-Seq analysis with a Q-value of <0.05 were considered significant. tpm = transcripts per million.

| Gene Name                 | NCBI Transcript ID | Fold Change |         | Avg. WT |                                     |
|---------------------------|--------------------|-------------|---------|---------|-------------------------------------|
|                           |                    | (log2)      | q-value | tpm     | Avg. <i>dj-1</i> <sup>-/-</sup> tpm |
| <i>nfic</i>               | XM_009303916.3     | 8.22        | 0.01    | 0.00    | 0.70                                |
| <i>mslna</i>              | XM_021474714.1     | 2.14        | 0.00    | 0.44    | 2.02                                |
| LOC110437990 (ncRNA)      | XR_002455805.1     | 2.12        | 0.01    | 7.87    | 32.20                               |
| <i>cldn19</i>             | NM_001017736.1     | 1.54        | 0.00    | 5.61    | 15.91                               |
| <i>zgc:194629</i> (ncRNA) | NR_120380.1        | 1.01        | 0.00    | 55.40   | 110.82                              |
| <i>mob2a</i>              | XM_005170681.4     | 0.88        | 0.00    | 9.92    | 18.14                               |
| <i>adamts1</i>            | XM_021475923.1     | 0.79        | 0.02    | 2.68    | 4.60                                |
| <i>kcnk3b</i>             | XM_694909.8        | 0.74        | 0.04    | 7.40    | 12.31                               |
| <i>slc16a6b</i>           | XM_685174.9        | 0.65        | 0.03    | 9.49    | 14.80                               |
| <i>abcf2a</i>             | NM_201315.2        | 0.52        | 0.03    | 54.02   | 77.35                               |
| <i>prr5a</i>              | XM_005163058.4     | 0.49        | 0.04    | 19.10   | 26.79                               |
| <i>strip2</i>             | XM_021475407.1     | 0.48        | 0.02    | 19.89   | 27.58                               |
| <i>rnf144ab</i>           | XM_005160676.4     | 0.38        | 0.04    | 50.12   | 65.35                               |
| <i>nr1d1</i>              | NM_205729.2        | 0.35        | 0.02    | 84.96   | 108.17                              |
| <i>hsp90aa1.2</i>         | NM_001045073.1     | 0.34        | 0.03    | 127.68  | 161.99                              |

**Table S2b****Genes significantly down-regulated in *dj1*<sup>-/-</sup> zebrafish brains**

Genes that were down-regulated in the brains of *dj-1*<sup>-/-</sup> mutants (n = 3) when compared to their wild-type siblings (n = 3) at 16 wpf. Differentially expressed transcripts from the RNA-Seq analysis with a Q-value of <0.05 were considered significant. tpm = transcripts per million.

| Gene Name                    | NCBI Transcript ID | Fold Change |         | Avg. WT |                                     |
|------------------------------|--------------------|-------------|---------|---------|-------------------------------------|
|                              |                    | (log2)      | q-value | tpm     | Avg. <i>dj-1</i> <sup>-/-</sup> tpm |
| <i>grm2b</i>                 | NM_001287547.1     | -11.41      | 0.00    | 60.20   | 0.02                                |
| si:ch211-102c2.8 (ncRNA)     | XM_021476476.1     | -7.68       | 0.01    | 1.42    | 0.00                                |
| <i>brk1</i>                  | XM_005172903.4     | -6.49       | 0.00    | 117.14  | 1.28                                |
| <i>park7</i> ( <i>dj-1</i> ) | NM_001005938.1     | -4.17       | 0.00    | 160.17  | 8.87                                |
| <i>pkma</i>                  | NM_199333.1        | -3.62       | 0.00    | 496.18  | 38.60                               |
| <i>vamp3</i>                 | NM_001002073.1     | -2.79       | 0.00    | 12.86   | 1.87                                |
| <i>gatm</i>                  | NM_199531.1        | -2.56       | 0.00    | 33.80   | 5.57                                |
| <i>her15.1</i>               | XM_003199526.5     | -1.63       | 0.00    | 13.18   | 4.05                                |
| <i>cldn19</i>                | XM_017358226.2     | -1.36       | 0.00    | 38.59   | 15.09                               |
| <i>kcnab2a</i>               | XM_009306291.3     | -1.23       | 0.00    | 19.41   | 8.20                                |
| <i>myef2</i>                 | NM_001037423.1     | -1.20       | 0.00    | 37.69   | 16.17                               |
| <i>camkvb</i>                | NM_200450.1        | -0.93       | 0.00    | 98.64   | 52.36                               |
| <i>gpx3</i>                  | NM_001137555.1     | -0.76       | 0.04    | 33.62   | 19.65                               |

**Table S3**  
**Gene set enrichment analysis (GSEA)**

**Hallmark gene sets enriched in the dj-1<sup>-/-</sup> zebrafish brain.** A list of Hallmark gene sets found significantly enriched in the dj-1<sup>-/-</sup> zebrafish brain. The thresholds for significance were NES >1.5, p-value < 0.05 and FDR-adjusted q-value < 0.05. NES = normalized enrichment score.

| Name                              | Gene set size | NES  | p-val | FDR-adjusted q-val |
|-----------------------------------|---------------|------|-------|--------------------|
| G2M Checkpoint                    | 125           | 2.11 | 0.00  | 0.00               |
| Oxidative Phosphorylation         | 139           | 2.04 | 0.00  | 0.00               |
| E2F Targets                       | 131           | 1.87 | 0.00  | 0.00               |
| Epithelial Mesenchymal Transition | 98            | 1.82 | 0.00  | 0.01               |
| Cholesterol Homeostasis           | 44            | 1.82 | 0.00  | 0.00               |
| PI3K AKT MTOR Signaling           | 63            | 1.69 | 0.00  | 0.02               |
| MYC Targets V1                    | 135           | 1.62 | 0.00  | 0.03               |
| MTORC1 Signaling                  | 137           | 1.60 | 0.00  | 0.03               |
| Mitotic Spindle                   | 121           | 1.57 | 0.00  | 0.04               |
| TGF beta Signaling                | 25            | 1.53 | 0.02  | 0.05               |
| Androgen Response                 | 64            | 1.53 | 0.01  | 0.04               |

**Table S4****Selection and calculations of extracted features of movement**

The features of movement being extracted and the previous research, investigating movement phenotypes in zebrafish, that inspired them. The principles used in this work are described in addition to the principles used in previous works.

| Feature                        | Based on                     | Stage in previous work | Principles in previous work                                                                       | Principles used here                                                                                                                    |
|--------------------------------|------------------------------|------------------------|---------------------------------------------------------------------------------------------------|-----------------------------------------------------------------------------------------------------------------------------------------|
| Distance travelled             | Keatinge et al., 2015        | Adult                  | Total displacement of zebrafish over recording (taken side on)                                    | Total displacement of zebrafish over recording (taken from above). Pythagoras theorem used to calculate distance travelled each second. |
| Velocity                       | Ingebretson and Masino, 2013 | Larval                 | Centre of mass used to determine velocity in swimming episodes                                    | Distance travelled divided by number of seconds spent swimming                                                                          |
| Time spent moving              | Godoy et al., 2015           | Larval                 | Percentage of time spent moving over a 10-minute period                                           | Percentage of time spent swimming at $\geq 5\text{mm/s}$                                                                                |
| Low/medium/high speed swimming | Keatinge et al., 2015        | Adult                  | Low speed: $<5\text{cm/s}$<br>Medium speed: $5 < x < 7\text{cm/s}$<br>High speed: $>7\text{cm/s}$ | Low speed: $0.5\text{cm} < x < 2\text{cm/s}$<br>Medium speed: $2 < x < 4\text{cm/s}$<br>High speed: $>4\text{cm/s}$                     |
| Mean swimming episode duration | Lambert et al., 2012         | Larval                 | Speed of $\geq 3\text{mm/s}$ for swimming episode                                                 | Speed of $\geq 5\text{mm/s}$ for swimming episode                                                                                       |
| Tail bend amplitude            | Budick and O'Malley, 2000    | Larval                 | Angle between rostral and caudal tangents subtracted from $180^\circ$                             | Sum of angles along zebrafish trace at maximum tail bend (low/medium/high speed).                                                       |
| Tail beat frequency            | Budick and O'Malley, 2000    | Larval                 | Frequency of tail beat cycles in a second                                                         | Frequency of maximum tail bends per second (low/medium/high speed).                                                                     |

**Table S5****Numbers used to evolve classifiers with features of movement**

The number of mutant and age matched control clips used to evolve classifiers with features of movement for each mutant line. An equal number of clips needed to be present in each class as accuracy was used as the measure of fitness. Each clip also had to have a value present for the features calculated (e.g. low/medium/high speed features).

| Mutants classified            | No. of mutant clips | No. of age matched control clips |
|-------------------------------|---------------------|----------------------------------|
| <i>dj-1<sup>-/-</sup></i>     | 30                  | 30                               |
| <i>pink1<sup>-/-</sup></i>    | 37                  | 37                               |
| <i>dmd<sup>ta222a/+</sup></i> | 25                  | 25                               |

**Table S6****Numbers used to evolve sliding window classifiers**

The number of mutant and age matched control clips used to evolve sliding window classifiers for each mutant line. The sliding window classifiers used the area under the curve as a measure of fitness which is insensitive to class imbalances. This allowed each class to have a different number of clips.

| Mutants classified            | No. of mutant clips | No. of age matched control clips |
|-------------------------------|---------------------|----------------------------------|
| <i>dj-1<sup>-/-</sup></i>     | 36                  | 64                               |
| <i>pink1<sup>-/-</sup></i>    | 39                  | 44                               |
| <i>dmd<sup>ta222a/+</sup></i> | 46                  | 42                               |

**Fig. S1**

**Analysis of extracted features of movement in *dj-1*<sup>-/-</sup> zebrafish at 8 wpf**

The features of movement compared between *dj-1*<sup>-/-</sup> and wild-type (WT) at 8 wpf including (A) distance travelled, (B) velocity, (C) percentage of time spent moving, (D) mean duration of a swimming episode, (E) tail beat frequency at low, medium and high swimming speeds, (F) tail bend amplitude at low, medium and high swimming speeds. \* = P < 0.05, \*\* = P < 0.01, \*\*\* = P < 0.001, ns = not significant.

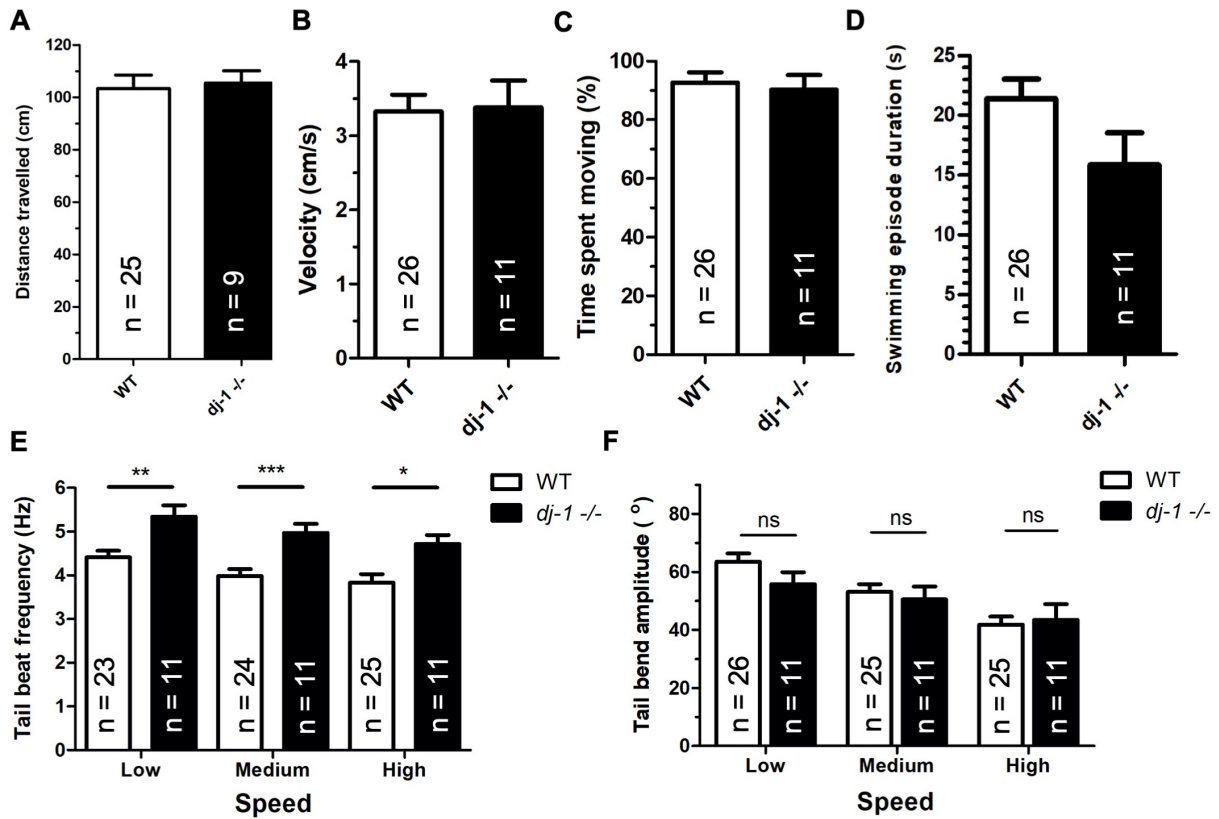

**Fig. S2**

**Principle component analysis**

The 5 principal components (PCs), generated from linear combinations of the 5 angles along the zebrafish spine, plot against time. The first PC (PC1) explains the most variation in the data, followed by PC2 and with each subsequent PC explaining less of the variation. Together all of the PCs explain 100% of the variation within the tail bend angle data. PC1 captured only broad movements whilst PC2 retained some high frequency movements.

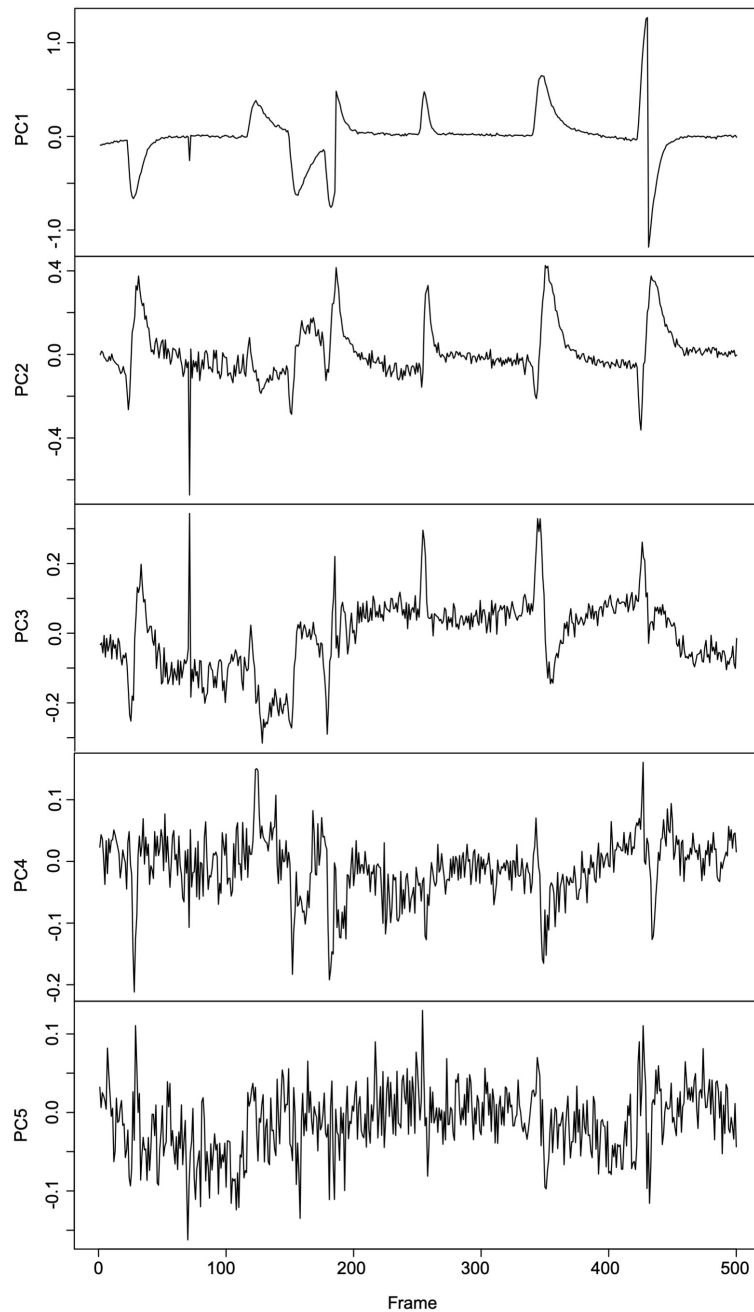

**Fig. S3****Scores of the *dmd*<sup>ta222a/+</sup> sliding window classifiers**

Training and test scores (AUCs) from the 20 sliding window classifiers evolved using the PC2 time series data from the 20 folds of data set.

| Run         | Training score | Test score |
|-------------|----------------|------------|
| 1           | 0.7318         | 0.3833     |
| 2           | 0.7227         | 0.3166     |
| 3           | 0.8636         | 0.45       |
| 4           | 0.8137         | 0.6334     |
| 5           | 0.8591         | 0.3834     |
| 6           | 0.8046         | 0.5334     |
| 7           | 0.7591         | 0.5334     |
| 8           | 0.8409         | 0.5833     |
| 9           | 0.8137         | 0.5167     |
| 10          | 0.7773         | 0.3167     |
| 11          | 0.7636         | 0.4166     |
| 12          | 0.7228         | 0.35       |
| 13          | 0.7409         | 0.4833     |
| 14          | 0.7727         | 0.25       |
| 15          | 0.7772         | 0.5166     |
| 16          | 0.7454         | 0.4166     |
| 17          | 0.7455         | 0.3167     |
| 18          | 0.7818         | 0.45       |
| 19          | 0.7682         | 0.3834     |
| 20          | 0.7182         | 0.3334     |
| <b>Mean</b> | 0.77614        | 0.42834    |
